# Supplementary material
Source: PubMed Central journal article supplement (PMC4475472)
Supplement: NIHMS687088-supplement-1.pdf [file NIHMS687088-supplement-1.pdf]

**Table S1. The effect of  $\gamma$ TE on sphingolipids in RAW264.7 cells**

RAW cells were treated with  $\gamma$ TE at 20  $\mu$ M or vehicle (Ctrl) for 8 or 16 h. Lipids were extracted and sphingolipids were measured by LC-MS/MS (Materials and Methods). All data are mean  $\pm$  SEM. The Student's t test was used to analyze results. \*P < 0.05 and \*\*P < 0.01 indicate significant differences between control and  $\gamma$ TE-treated cells. Cer: Ceramide; dhCer: dihydroceramide; Sph: sphingosine; dhSph: dihydrosphingosine; Sph-P: sphingosine 1 phosphate; dhSph-P: dihydrosphingosine phosphate; PC: Total phospholipids

| Ceramides (pmol/ $\mu$ g PC) | Ctrl 8 h          | $\gamma$ TE 20 $\mu$ M 8 h | Ctrl 16 h         | $\gamma$ TE 20 $\mu$ M 16 h |
|------------------------------|-------------------|----------------------------|-------------------|-----------------------------|
| C16:0-Cer                    | 1.85 $\pm$ 0.15   | 2.02 $\pm$ 0.26            | 1.64 $\pm$ 0.12   | 2.03 $\pm$ 0.20             |
| C18:0-Cer                    | 0.14 $\pm$ 0.016  | 0.13 $\pm$ 0.014           | 0.11 $\pm$ 0.01   | 0.12 $\pm$ 0.01             |
| C20:0-Cer                    | 0.087 $\pm$ 0.01  | 0.069 $\pm$ 0.01*          | 0.062 $\pm$ 0.01  | 0.066 $\pm$ 0.005           |
| C22:0-Cer                    | 0.70 $\pm$ 0.061  | 0.56 $\pm$ 0.059           | 0.40 $\pm$ 0.032  | 0.44 $\pm$ 0.038            |
| C24:1-Cer                    | 3.33 $\pm$ 0.57   | 2.07 $\pm$ 0.30**          | 2.75 $\pm$ 0.47   | 1.84 $\pm$ 0.31*            |
| C24:0-Cer                    | 4.86 $\pm$ 0.56   | 3.31 $\pm$ 0.44*           | 2.69 $\pm$ 0.43   | 3.98 $\pm$ 0.69*            |
| C26:1-Cer                    | 0.072 $\pm$ 0.011 | 0.054 $\pm$ 0.01*          | 0.033 $\pm$ 0.006 | 0.030 $\pm$ 0.005           |
| C26:0-Cer                    | 0.048 $\pm$ 0.014 | 0.037 $\pm$ 0.013          | 0.024 $\pm$ 0.006 | 0.040 $\pm$ 0.009           |
| Total Cer                    | 11.09 $\pm$ 1.17  | 8.25 $\pm$ 0.87*           | 7.71 $\pm$ 0.85   | 8.55 $\pm$ 1.11             |

| Dihydroceramides (pmol/ $\mu$ g PC) | Ctrl 8 h            | $\gamma$ TE 20 $\mu$ M 8 h | Ctrl 16 h            | $\gamma$ TE 20 $\mu$ M 16 h |
|-------------------------------------|---------------------|----------------------------|----------------------|-----------------------------|
| C16:0-dhCer                         | 0.20 $\pm$ 0.023    | 0.43 $\pm$ 0.031**         | 0.10 $\pm$ 0.0009    | 0.32 $\pm$ 0.038**          |
| C18:0-dhCer                         | 0.0060 $\pm$ 0.001  | 0.011 $\pm$ 0.001**        | 0.0022 $\pm$ 0.0002  | 0.0079 $\pm$ 0.001**        |
| C20:0-dhCer                         | 0.0024 $\pm$ 0.0005 | 0.0047 $\pm$ 0.001**       | 0.00074 $\pm$ 0.0001 | 0.0029 $\pm$ 0.0004**       |
| C22:0-dhCer                         | 0.016 $\pm$ 0.005   | 0.028 $\pm$ 0.007**        | 0.0034 $\pm$ 0.0003  | 0.015 $\pm$ 0.002**         |
| C24:1-dhCer                         | 0.034 $\pm$ 0.01    | 0.053 $\pm$ 0.01*          | 0.014 $\pm$ 0.002    | 0.038 $\pm$ 0.01**          |
| C24:0-dhCer                         | 0.053 $\pm$ 0.02    | 0.086 $\pm$ 0.02**         | 0.012 $\pm$ 0.002    | 0.072 $\pm$ 0.01**          |
| Total dhCer                         | 0.31 $\pm$ 0.05     | 0.61 $\pm$ 0.05**          | 0.13 $\pm$ 0.01      | 0.46 $\pm$ 0.05**           |

| Sphingoid bases (pmol/ $\mu$ g PC) | Ctrl 8 h           | $\gamma$ TE 20 $\mu$ M 8 h | Ctrl 16 h          | $\gamma$ TE 20 $\mu$ M 16 h |
|------------------------------------|--------------------|----------------------------|--------------------|-----------------------------|
| Sph                                | 0.93 $\pm$ 0.088   | 0.73 $\pm$ 0.088*          | 0.77 $\pm$ 0.088   | 0.54 $\pm$ 0.069*           |
| dhSph                              | 0.25 $\pm$ 0.027   | 0.30 $\pm$ 0.043           | 0.18 $\pm$ 0.013   | 0.18 $\pm$ 0.041            |
| Sph-P                              | 0.032 $\pm$ 0.005  | 0.032 $\pm$ 0.007          | 0.035 $\pm$ 0.003  | 0.017 $\pm$ 0.001           |
| dhSph-P                            | 0.0076 $\pm$ 0.004 | 0.013 $\pm$ 0.007          | 0.0084 $\pm$ 0.005 | 0.0047 $\pm$ 0.002          |

| Sphingomyelins (pmol/ $\mu$ g PC) | Ctrl 8 h         | $\gamma$ TE 20 $\mu$ M 8 h | Ctrl 16 h        | $\gamma$ TE 20 $\mu$ M 16 h |
|-----------------------------------|------------------|----------------------------|------------------|-----------------------------|
| C16:0-SM                          | 82.05 $\pm$ 6.01 | 78.63 $\pm$ 6.86           | 71.95 $\pm$ 7.62 | 55.72 $\pm$ 2.22*           |
| C18:0-SM                          | 7.64 $\pm$ 0.79  | 6.21 $\pm$ 1.04            | 6.37 $\pm$ 1.06  | 4.45 $\pm$ 0.58*            |

|          |              |              |              |              |
|----------|--------------|--------------|--------------|--------------|
| C20:0-SM | 3.59±0.35    | 2.95±0.43    | 3.12±0.52    | 2.26±0.25    |
| C22:0-SM | 18.53±2.23   | 14.10±1.94   | 15.52±2.61   | 11.06±0.83   |
| C24:1-SM | 52.17±6.02   | 38.91±4.94   | 45.01±6.51   | 25.88±1.81** |
| C24:0-SM | 23.25±4.98   | 17.86±3.37   | 24.71±5.95   | 17.99±1.96   |
| C26:1-SM | 0.44±0.099   | 0.36±0.057   | 0.35±0.082   | 0.28±0.031   |
| C26:0-SM | 0.092±0.018  | 0.078±0.014  | 0.100±0.018  | 0.091±0.011  |
| Total SM | 187.75±16.77 | 151.65±17.16 | 167.13±21.94 | 117.74±6.18* |

| Dihydro-sphingomyelins (pmol/μg PC) | Ctrl 8 h   | γTE 20 μM 8 h | Ctrl 16 h  | γTE 20 μM 16 h |
|-------------------------------------|------------|---------------|------------|----------------|
| C16:0-dhSM                          | 25.75±3.15 | 25.46±3.30    | 17.82±2.68 | 20.39±0.79     |
| C18:0-dhSM                          | 3.32±0.58  | 2.74±0.40     | 2.25±0.47  | 1.89±0.14      |
| C20:0-dhSM                          | 1.00±0.19  | 0.88±0.14     | 0.71±0.15  | 0.68±0.036     |
| C22:0-dhSM                          | 3.79±0.81  | 3.57±0.60     | 3.27±0.77  | 3.40±0.29      |
| C24:1-dhSM                          | 7.87±2.62  | 6.48±1.20     | 6.27±1.75  | 5.30±0.95      |
| C24:0-dhSM                          | 2.30±0.77  | 2.00±0.42     | 2.37±0.73  | 3.04±0.43      |
| Total dhSM                          | 44.09±7.11 | 41.16±5.39    | 32.74±5.67 | 34.74±1.70     |
